# Supplementary material for: HealthNode: Software Framework for Efficiently Designing and Developing Cloud-Based Healthcare Applications
Source: Hindawi journal article supplement (doi:10.1155/2018/6071580), 2018-01-01
Supplement: f1 [file 6071580.f1.zip]

Archive with 26 entries (20 files):
- __MACOSX/healthNode/
- __MACOSX/healthNode/._.DS_Store
- __MACOSX/healthNode/AccessFromJavaAndAndroid/
- __MACOSX/healthNode/AccessFromJavaAndAndroid/._.DS_Store
- __MACOSX/healthNode/AccessFromJavaAndAndroid/._Example.java
- __MACOSX/healthNode/AccessFromWeb/
- __MACOSX/healthNode/AccessFromWeb/._index.html
- healthNode/.DS_Store
- healthNode/AccessFromJavaAndAndroid/
- healthNode/AccessFromJavaAndAndroid/.DS_Store
- healthNode/AccessFromJavaAndAndroid/Example.java
- healthNode/AccessFromJavaAndAndroid/HealthNodeJavaAndroid.jar
- healthNode/AccessFromWeb/
- healthNode/AccessFromWeb/index.html
- healthNode/app.js
- healthNode/ArduinoSerialComm/
- healthNode/ArduinoSerialComm/serialComm.ino
- healthNode/doctors.js
- healthNode/example.js
- healthNode/expressSetup.js
- healthNode/file_upload.js
- healthNode/package.json
- healthNode/patients.js
- healthNode/README.txt
- healthNode/serialportOperation.js
- healthNode/server.js
