# Supplementary material for: HealthNode: Software Framework for Efficiently Designing and Developing Cloud-Based Healthcare Applications
Source: Hindawi journal article supplement (doi:10.1155/2018/6071580), 2018-01-01
Supplement: f1 [file 6071580.f1.zip › healthNode/AccessFromJavaAndAndroid/Example.java]

import java.io.IOException;


public class Example {
	public static void main(String[] args) throws IOException {
                System.out.println("Test starting:");
                HealthNodeAndroidLib tt = new HealthNodeAndroidLib(""); // Replace "" with "ip/webAddress:port" information
                String result1 = tt.sendQueryData("testDoctor", ""); // "testDoctor" is middleware function, place data in second parameter.
                String result2 = tt.sendQueryData("testPatients", "");
                String result3 = tt.fileUpload("/Users/hk/Dropbox/workspace/HealthNodeAndroid/src/logo.jpg");
                String result4 = tt.fileUpload("/Users/hk/Dropbox/workspace/HealthNodeAndroid/src/sound.wav");
                System.out.println("\t"+result1);
                System.out.println("\t"+result2);
                System.out.println("\t"+result3);
                System.out.println("\t"+result4);
	}
}
