# Supplementary material for: HealthNode: Software Framework for Efficiently Designing and Developing Cloud-Based Healthcare Applications
Source: Hindawi journal article supplement (doi:10.1155/2018/6071580), 2018-01-01
Supplement: f1 [file 6071580.f1.zip › healthNode/AccessFromWeb/index.html]

|  |
| --- |
| Send data |
