# Supplementary material for: HealthNode: Software Framework for Efficiently Designing and Developing Cloud-Based Healthcare Applications
Source: Hindawi journal article supplement (doi:10.1155/2018/6071580), 2018-01-01
Supplement: f1 [file 6071580.f1.zip › healthNode/app.js]

var hNode = require('./server');
//exports.printMsg = function() {
//	console.log("hello")
//}

hNode.init({});
hNode.start({});
