# Supplementary material for: HealthNode: Software Framework for Efficiently Designing and Developing Cloud-Based Healthcare Applications
Source: Hindawi journal article supplement (doi:10.1155/2018/6071580), 2018-01-01
Supplement: f1 [file 6071580.f1.zip › healthNode/ArduinoSerialComm/serialComm.ino]

void setup() {
    Serial.begin(115200);
}

void loop() {
  while(Serial.available()){
    //fromSerial includes received data from serial
    fromSerial = Serial.readString();    
  }
  //Serial.println sends data to Node.js server through serial comm
  Serial.println("hello"); 
}
