# Supplementary material for: HealthNode: Software Framework for Efficiently Designing and Developing Cloud-Based Healthcare Applications
Source: Hindawi journal article supplement (doi:10.1155/2018/6071580), 2018-01-01
Supplement: f1 [file 6071580.f1.zip › healthNode/file_upload.js]

var fs = require("fs");
//configure dirname:
var dirname ="/Users/hk/Documents";

module.exports = function(app, mongoClient, mongoDBuri) {

app.post('/uploads', function(req, res) {
	console.log("Uploading file:" + req.files.fileU.originalname);
	//console.log(req);
	//console.log(req.files.image.originalname);
	//console.log(req.files.image.path);
	fs.readFile(req.files.fileU.path, function (err, data){
		var newPath = dirname + "/uploads/" + 	req.files.fileU.originalname;
		fs.writeFile(newPath, data, function (err) {
			if(err){
				res.json({'response':"Error"});
			}else {
				res.json({'response':"Saved"});
			}
		});
	});
});

//this is for debug. for safety disabled.
app.get('/uploads/:file', function (req, res){
	file = req.params.file;
	console.log("File requested: " + file);
	var img = fs.readFileSync(dirname + "/uploads/" + file);
	res.writeHead(200, {'Content-Type': 'image/jpg' });
	res.end(img, 'binary');
});

};
