# Supplementary material for: HealthNode: Software Framework for Efficiently Designing and Developing Cloud-Based Healthcare Applications
Source: Hindawi journal article supplement (doi:10.1155/2018/6071580), 2018-01-01
Supplement: f1 [file 6071580.f1.zip › healthNode/package.json]

{
  "name": "HealthNode",
  "version": "1.0.0",
  "description": "HealthNode framework for accepting and sending data",
  "main": "app.js",
  "scripts": {
    "test": "echo \"Error: no test specified\" && exit 1"
  },
  "keywords": [
    "HealthNode"
  ],
  "author": "Ho-Kyeong Ra",
  "license": "ISC",
  "dependencies": {
    "mongodb": "^3.0.1",
    "body-parser": "1.12.2",
    "express": "4.0.0",
    "multer": "0.1.8",
    "serialport": "5.0.0-beta8"
  }
}
