# Supplementary material for: HealthNode: Software Framework for Efficiently Designing and Developing Cloud-Based Healthcare Applications
Source: Hindawi journal article supplement (doi:10.1155/2018/6071580), 2018-01-01
Supplement: f1 [file 6071580.f1.zip › healthNode/README.txt]

A. Install:
Node.js & MongoDB


B. Local HealthNode NPM installation command:
npm install /dir/to/healthNode/


C. After installation, configure the following:
-mongoDBUri in "node_modules/HealthNode/expressSetup.js"
-file_upload dirname in "node_modules/HealthNode/file_upload.js"
-serial port information in 
"node_modules/HealthNode/serialportOperation.js"


D. After installation and configuration, simply import HealthNode. 
Thereafter, the prebuilt middleware functions are called from web 
browser/mobile application:

Example:
    File name: index.js
    File content: var hn = require('HealthNode');
    Execute: node index.js


E. JSON message sender for Android/Java (library as jar file)/web 
example are located in:
-Android/Java example: 
"node_modules/HealthNode/AccessFromJavaAndAndroid/"
-Web browser example: "node_modules/HealthNode/AccessFromWeb/"
