# Supplementary material for: HealthNode: Software Framework for Efficiently Designing and Developing Cloud-Based Healthcare Applications
Source: Hindawi journal article supplement (doi:10.1155/2018/6071580), 2018-01-01
Supplement: f1 [file 6071580.f1.zip › healthNode/server.js]

var app

//handover port number
exports.init = function(data){
	data = data || {};
	app = require('./expressSetup').app;
}


exports.start = function start(done){
	server = app.listen(process.env.PORT || 3000, function afterListen() {
		console.log("HealthNode server started")
	});
};
